# Supplementary material
Source: HighWire-hosted journal article supplement (https://erj.ersjournals.com/content/56/1/2000627)
Supplement: inline-supplementary-material-1 [file inline-supplementary-material-1.pdf]

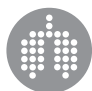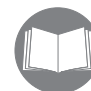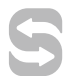

SHAREABLE PDF

# The DisEntangling Chronic Obstructive pulmonary Disease Exacerbations clinical trials NETwork (DECODE-NET): rationale and vision

Alexander G. Mathioudakis <sup>1,2</sup>, Pradeesh Sivapalan<sup>3,4</sup>, Alberto Papi <sup>5</sup> and Jørgen Vestbo <sup>1,2</sup> on behalf of the DECODE-NET (DisEntangling Chronic Obstructive pulmonary Disease Exacerbations clinical trials NETwork) Investigators<sup>6</sup>

**Affiliations:** <sup>1</sup>Division of Infection, Immunity and Respiratory Medicine, School of Biological Sciences, The University of Manchester, Manchester Academic Health Science Centre, Manchester, UK. <sup>2</sup>The North West Lung Centre, Wythenshawe Hospital, Manchester University NHS Foundation Trust, Manchester, UK. <sup>3</sup>Section of Respiratory Medicine, Dept of Internal Medicine, Herlev-Gentofte Hospital, Hellerup, Denmark. <sup>4</sup>Dept of Internal Medicine, Zealand University Hospital, Roskilde, Denmark. <sup>5</sup>Research Center on Asthma and COPD, Dept of Medical Sciences, University of Ferrara, Ferrara, Italy. <sup>6</sup>A list of the DECODE-NET Investigators can be found in the acknowledgements section.

**Correspondence:** Jørgen Vestbo, Division of Infection, Immunity and Respiratory Medicine, School of Biological Sciences, The University of Manchester, UK. E-mail: jorgen.vestbo@manchester.ac.uk

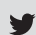

@ERSpublications

The DisEntangling Chronic Obstructive pulmonary Disease Exacerbations clinical trials NETwork: #DECODE\_NET. Vision statement of an emerging, global network aiming to conduct collaborative clinical research on COPD exacerbation management @ERSpublications <https://bit.ly/36kISgp>

**Cite this article as:** Mathioudakis AG, Sivapalan P, Papi A, *et al.* The DisEntangling Chronic Obstructive pulmonary Disease Exacerbations clinical trials NETwork (DECODE-NET): rationale and vision. *Eur Respir J* 2020; 56: 2000627 [<https://doi.org/10.1183/13993003.00627-2020>].

This single-page version can be shared freely online.

Acute exacerbations are largely responsible for the poor outcomes characterising COPD, the third leading cause of death globally and associated with a significant disability and socioeconomic burden [1, 2]. Every year, 22–40% of all people suffering from COPD experience at least one moderate or severe exacerbation, while 9–16% experience more than one [3, 4]. Exacerbations are associated with an increased risk of subsequent exacerbations, cardiac events, worse quality of life and an accelerated lung function decline [5]. 15% of all severe exacerbations requiring hospitalisation lead to death within 90 days [6]. Thus, it is not surprising that patients consider exacerbations and hospitalisations due to exacerbations the most important, burdensome outcomes of COPD [7].
